# Supplementary material
Source: Springer Nature journal article supplement (https://www.springermedizin.de/resource/supplementary/13058_2012_3150_MOESM16_ESM.pdf/9703386)

**A**

NKI295 minus basal tumors

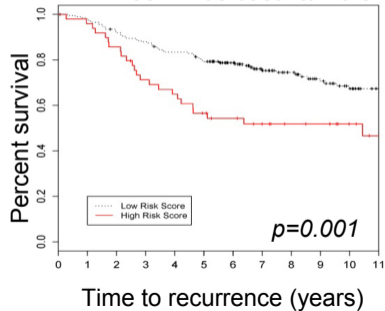

UNC232 minus basal tumors

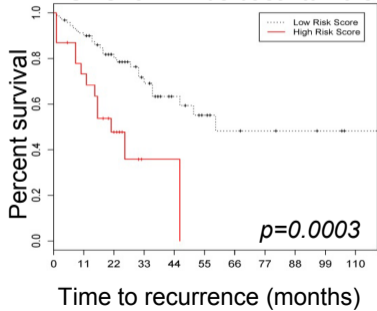**B**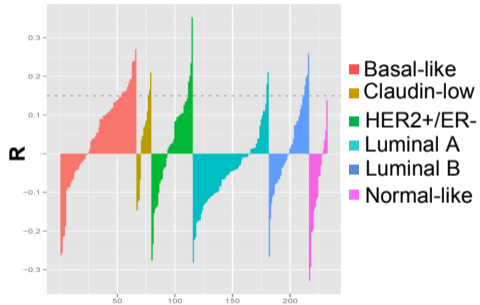

Supplement: MOESM16 [file 9703386]
